# Supplementary material for: Prognostic analysis of lung adenocarcinoma based on cancer-associated fibroblasts genes using scRNA-sequencing
Source: Aging (Albany NY). 2023 Jul 11;15(14):6774–97. doi: 10.18632/aging.204838 (PMC10415565; doi:10.18632/aging.204838)
Supplement: Supplementary Table 1 [file aging-15-204838-s002.xlsx]

## Sheet: Sheet1
Supplementary Table 1. Details of the 120 CAFs-associated genes in scRNA-seq.
Gene Symbol	p_val	avg_log2FC	pct.1	pct.2	p_val_adj	cluster	gene
COL3A1	0	4.90169	0.853	0.012	0	Fibroblasts	COL3A1
COL1A2	0	4.79698	0.924	0.029	0	Fibroblasts	COL1A2
COL1A1	0	4.68688	0.878	0.079	0	Fibroblasts	COL1A1
LUM	0	4.20258	0.746	0.007	0	Fibroblasts	LUM
MGP	0	4.19794	0.827	0.1	0	Fibroblasts	MGP
DCN	0	4.04035	0.862	0.006	0	Fibroblasts	DCN
TIMP1	0	3.85727	0.96	0.372	0	Fibroblasts	TIMP1
IGFBP7	0	3.78368	0.932	0.089	0	Fibroblasts	IGFBP7
SPARC	0	3.56501	0.903	0.073	0	Fibroblasts	SPARC
TAGLN	0	3.50455	0.726	0.034	0	Fibroblasts	TAGLN
CALD1	0	3.43292	0.965	0.047	0	Fibroblasts	CALD1
RARRES2	0	3.24571	0.836	0.016	0	Fibroblasts	RARRES2
SFRP2	0	3.04343	0.465	0.002	0	Fibroblasts	SFRP2
COL6A3	0	2.97745	0.77	0.018	0	Fibroblasts	COL6A3
BGN	0	2.90285	0.899	0.005	0	Fibroblasts	BGN
COL6A2	0	2.86892	0.91	0.03	0	Fibroblasts	COL6A2
A2M	0	2.74338	0.772	0.144	0	Fibroblasts	A2M
C11orf96	0	2.66606	0.726	0.054	0	Fibroblasts	C11orf96
SPARCL1	0	2.61652	0.818	0.017	0	Fibroblasts	SPARCL1
ACTA2	0	2.55878	0.602	0.022	0	Fibroblasts	ACTA2
POSTN	0	2.54427	0.448	0.008	0	Fibroblasts	POSTN
CCDC80	0	2.41287	0.653	0.026	0	Fibroblasts	CCDC80
FBLN1	0	2.40195	0.661	0.007	0	Fibroblasts	FBLN1
COL6A1	0	2.3802	0.866	0.038	0	Fibroblasts	COL6A1
CTHRC1	0	2.37755	0.526	0.025	0	Fibroblasts	CTHRC1
C1R	0	2.37503	0.883	0.037	0	Fibroblasts	C1R
TPM2	0	2.37156	0.823	0.046	0	Fibroblasts	TPM2
IGFBP5	0	2.29748	0.526	0.023	0	Fibroblasts	IGFBP5
MMP2	0	2.26209	0.663	0.02	0	Fibroblasts	MMP2
PTGDS	0	2.21793	0.449	0.014	0	Fibroblasts	PTGDS
FN11	0	2.20768	0.917	0.216	0	Fibroblasts	FN1
C1S	0	2.1861	0.845	0.028	0	Fibroblasts	C1S
NNMT	0	2.14715	0.802	0.06	0	Fibroblasts	NNMT
IFITM3	0	2.1139	0.94	0.308	0	Fibroblasts	IFITM3
COL5A2	0	2.09681	0.684	0.006	0	Fibroblasts	COL5A2
AEBP1	0	2.02787	0.763	0.005	0	Fibroblasts	AEBP1
TIMP3	0	2.0121	0.69	0.065	0	Fibroblasts	TIMP3
COL4A1	0	1.94264	0.562	0.013	0	Fibroblasts	COL4A1
VCAN1	0	1.90939	0.711	0.102	0	Fibroblasts	VCAN
SERPING1	0	1.90198	0.88	0.111	0	Fibroblasts	SERPING1
SERPINF1	0	1.88756	0.666	0.058	0	Fibroblasts	SERPINF1
THY1	0	1.87133	0.64	0.002	0	Fibroblasts	THY1
TPM1	0	1.84917	0.813	0.174	0	Fibroblasts	TPM1
IGFBP4	0	1.83472	0.776	0.104	0	Fibroblasts	IGFBP4
MYL9	0	1.79473	0.744	0.048	0	Fibroblasts	MYL9
LGALS11	0	1.77963	0.971	0.465	0	Fibroblasts	LGALS1
COL4A2	0	1.72732	0.609	0.014	0	Fibroblasts	COL4A2
NBL1	0	1.70558	0.722	0.064	0	Fibroblasts	NBL1
CTGF	0	1.69029	0.577	0.049	0	Fibroblasts	CTGF
C7	0	1.68749	0.359	0.016	0	Fibroblasts	C7
RARRES1	0	1.6827	0.501	0.038	0	Fibroblasts	RARRES1
SELENOM	0	1.67781	0.86	0.19	0	Fibroblasts	SELENOM
CYR61	0	1.66357	0.649	0.133	0	Fibroblasts	CYR61
PCOLCE	0	1.60198	0.699	0.01	0	Fibroblasts	PCOLCE
CFH	0	1.57515	0.688	0.062	0	Fibroblasts	CFH
SULF1	0	1.5274	0.492	0.004	0	Fibroblasts	SULF1
CTSK	0	1.50185	0.561	0.029	0	Fibroblasts	CTSK
COL18A1	0	1.50127	0.579	0.059	0	Fibroblasts	COL18A1
THBS2	0	1.49125	0.574	0.001	0	Fibroblasts	THBS2
COL5A1	0	1.47733	0.554	0.007	0	Fibroblasts	COL5A1
PRRX1	0	1.39249	0.698	0.009	0	Fibroblasts	PRRX1
PDGFRB	0	1.38299	0.606	0.005	0	Fibroblasts	PDGFRB
NR2F2	0	1.35245	0.653	0.079	0	Fibroblasts	NR2F2
FSTL1	0	1.34406	0.7	0.031	0	Fibroblasts	FSTL1
TGM2	0	1.34274	0.538	0.112	0	Fibroblasts	TGM2
EGFL6	0	1.31863	0.38	0.002	0	Fibroblasts	EGFL6
MFAP4	0	1.28148	0.501	0.001	0	Fibroblasts	MFAP4
CDH11	0	1.26244	0.579	0.024	0	Fibroblasts	CDH11
MYLK	0	1.24492	0.647	0.011	0	Fibroblasts	MYLK
SOD3	0	1.23767	0.592	0.029	0	Fibroblasts	SOD3
LHFPL6	0	1.22099	0.516	0.015	0	Fibroblasts	LHFPL6
FBN1	0	1.21811	0.604	0.006	0	Fibroblasts	FBN1
EMILIN1	0	1.21721	0.612	0.009	0	Fibroblasts	EMILIN1
PDLIM3	0	1.21635	0.579	0.014	0	Fibroblasts	PDLIM3
CPE	0	1.20236	0.433	0.029	0	Fibroblasts	CPE
CAV1	0	1.18854	0.59	0.075	0	Fibroblasts	CAV1
LTBP2	0	1.18494	0.544	0.011	0	Fibroblasts	LTBP2
MEG3	0	1.17703	0.437	0.019	0	Fibroblasts	MEG3
ADH1B	0	1.15608	0.293	0.001	0	Fibroblasts	ADH1B
TCF4	0	1.1384	0.718	0.123	0	Fibroblasts	TCF4
COL14A1	0	1.12497	0.443	0.001	0	Fibroblasts	COL14A1
UACA	0	1.11866	0.542	0.043	0	Fibroblasts	UACA
PALLD	0	1.10819	0.615	0.079	0	Fibroblasts	PALLD
LTBP1	0	1.10741	0.547	0.01	0	Fibroblasts	LTBP1
FILIP1L	0	1.10711	0.547	0.064	0	Fibroblasts	FILIP1L
PLAC9	0	1.1057	0.534	0.002	0	Fibroblasts	PLAC9
SERPINE1	0	1.10567	0.294	0.02	0	Fibroblasts	SERPINE1
SERPINH1	0	1.1	0.67	0.177	0	Fibroblasts	SERPINH1
MXRA5	0	1.08446	0.46	0.006	0	Fibroblasts	MXRA5
MFGE8	0	1.06894	0.63	0.066	0	Fibroblasts	MFGE8
MXRA8	0	1.06846	0.59	0.015	0	Fibroblasts	MXRA8
VCAM1	0	1.06454	0.438	0.047	0	Fibroblasts	VCAM1
COL8A1	0	1.05378	0.448	0.02	0	Fibroblasts	COL8A1
FMO2	0	1.05124	0.399	0.006	0	Fibroblasts	FMO2
CNN3	0	1.03974	0.708	0.103	0	Fibroblasts	CNN3
DST	0	1.03099	0.665	0.148	0	Fibroblasts	DST
INHBA	0	1.03024	0.411	0.065	0	Fibroblasts	INHBA
LAMA4	0	1.0283	0.595	0.009	0	Fibroblasts	LAMA4
ANTXR1	0	1.02514	0.529	0.018	0	Fibroblasts	ANTXR1
SPON2	0	1.01465	0.429	0.036	0	Fibroblasts	SPON2
CAVIN1	0	1.00835	0.659	0.063	0	Fibroblasts	CAVIN1
CARMN	0	1.00554	0.35	0.002	0	Fibroblasts	CARMN
LXN	0	1.00202	0.411	0.036	0	Fibroblasts	LXN
IGFBP2	1.44e-303	1.60495	0.471	0.09	3.52e-299	Fibroblasts	IGFBP2
PTMS	5.18e-294	1.0461	0.825	0.302	1.27e-289	Fibroblasts	PTMS
CCL2	1.13e-282	1.38819	0.425	0.077	2.77e-278	Fibroblasts	CCL2
ADIRF	1.57e-278	1.46941	0.41	0.076	3.84e-274	Fibroblasts	ADIRF
LAPTM4A1	1.15e-258	1.0056	0.876	0.412	2.82e-254	Fibroblasts	LAPTM4A
ID3	8.63e-257	1.2193	0.633	0.184	2.12e-252	Fibroblasts	ID3
ITGB1	2.8e-234	1.14378	0.88	0.472	6.86e-230	Fibroblasts	ITGB1
DSTN1	6.11e-233	1.12732	0.862	0.374	1.5e-228	Fibroblasts	DSTN
CD63	8.56e-201	1.04943	0.982	0.788	2.1e-196	Fibroblasts	CD63
VIM2	3.73e-190	1.18956	0.991	0.782	9.14e-186	Fibroblasts	VIM
MT2A	4.61e-177	1.78846	0.744	0.345	1.13e-172	Fibroblasts	MT2A
PPIB	7.82e-172	1.00677	0.835	0.51	1.92e-167	Fibroblasts	PPIB
CYP1B1	4.15e-133	1.05659	0.369	0.109	1.02e-128	Fibroblasts	CYP1B1
EGR11	3.63e-124	1.14133	0.702	0.371	8.9e-120	Fibroblasts	EGR1
CLU1	6.63e-113	1.8682	0.421	0.15	1.62e-108	Fibroblasts	CLU
C3	4.86e-83	1.21049	0.408	0.166	1.19e-78	Fibroblasts	C3
CFD1	3.39e-19	1.20626	0.262	0.158	8.31e-15	Fibroblasts	CFD
