# Supplementary material for: Prognostic analysis of lung adenocarcinoma based on cancer-associated fibroblasts genes using scRNA-sequencing
Source: Aging (Albany NY). 2023 Jul 11;15(14):6774–97. doi: 10.18632/aging.204838 (PMC10415565; doi:10.18632/aging.204838)
Supplement: Supplementary Table 3 [file aging-15-204838-s004.xlsx]

## Sheet: Sheet1
Supplementary Table 3. ‘Estimate’ score for each LUAD patient in TCGA data.
ID	StromalScore	ImmuneScore	ESTIMATEScore	TumorPurity
TCGA-35-5375-01A-01R-1628-07	214.638	1596.46	1811.1	0.644188
TCGA-55-A4DF-01A-11R-A24H-07	-205.584	1828.58	1622.99	0.665059
TCGA-95-8039-01A-11R-2241-07	280.77	1972.74	2253.51	0.593193
TCGA-MP-A4T4-01A-11R-A262-07	998.572	2458.09	3456.66	0.442524
TCGA-62-A471-01A-12R-A24H-07	-1139.61	407.357	-732.252	0.878778
TCGA-L9-A5IP-01A-21R-A39D-07	-455.841	1055.68	599.844	0.769309
TCGA-50-5936-01A-11R-1628-07	467.953	1168.91	1636.87	0.663537
TCGA-49-AARR-01A-11R-A41B-07	711.821	1956.33	2668.15	0.543126
TCGA-78-8662-01A-11R-2403-07	-653.827	61.5365	-592.29	0.868789
TCGA-05-4430-01A-02R-1206-07	1342.1	1866.74	3208.85	0.474845
TCGA-44-7659-01A-11R-2066-07	-289.454	1178.23	888.772	0.74153
TCGA-44-6146-01A-11R-A278-07	-793.154	104.066	-689.088	0.875737
TCGA-L9-A50W-01A-12R-A39D-07	-129.219	1276.05	1146.83	0.71559
TCGA-75-7025-01A-12R-1949-07	647.416	1819.29	2466.71	0.567713
TCGA-05-4424-01A-22R-1858-07	797.237	1688.16	2485.39	0.565453
TCGA-62-A46P-01A-11R-A24H-07	-292.761	619.024	326.264	0.794338
TCGA-38-4627-01A-01R-1206-07	2174.85	1980.67	4155.52	0.348365
TCGA-86-8073-01A-11R-2241-07	594.432	1150.65	1745.09	0.651569
TCGA-69-7765-01A-11R-2170-07	1318.47	1678.01	2996.48	0.502044
TCGA-44-5645-01B-04R-A277-07	673.914	1491.12	2165.04	0.603598
TCGA-55-6984-01A-11R-1949-07	-592.854	985.251	392.396	0.788404
TCGA-69-7764-01A-11R-2170-07	-107.394	921.314	813.92	0.748857
TCGA-NJ-A4YI-01A-11R-A262-07	310.263	1367.9	1678.16	0.658989
TCGA-86-A4P7-01A-11R-A24X-07	777.654	2113.1	2890.75	0.515405
TCGA-55-8620-01A-11R-2403-07	-737.137	1129.18	392.041	0.788436
TCGA-97-8177-01A-11R-2287-07	1205	2150.94	3355.94	0.455733
TCGA-50-6595-01A-12R-1858-07	1293.1	1718.96	3012.06	0.500065
TCGA-55-A492-01A-11R-A24H-07	-372.776	768.985	396.209	0.788059
TCGA-78-7633-01A-11R-2066-07	-299.686	191.843	-107.843	0.831409
TCGA-97-A4LX-01A-11R-A24X-07	1307.1	2756.06	4063.16	0.361041
TCGA-78-7220-01A-11R-2039-07	-533.692	146.291	-387.401	0.853505
TCGA-53-7624-01A-11R-2066-07	-717.841	704.383	-13.4575	0.823631
TCGA-49-AARN-01A-21R-A41B-07	-8.26541	1244.07	1235.81	0.706405
TCGA-62-A46R-01A-11R-A24H-07	246.917	1795.52	2042.44	0.617848
TCGA-78-7156-01A-11R-2039-07	-513.548	339.296	-174.252	0.836786
TCGA-50-8457-01A-11R-2326-07	923.601	2246.46	3170.06	0.479847
TCGA-91-8496-01A-11R-2403-07	367.583	2187.77	2555.35	0.556954
TCGA-55-8092-01A-11R-2241-07	430.068	2083.92	2513.99	0.561986
TCGA-75-5122-01A-01R-1755-07	855.088	3382.39	4237.48	0.337064
TCGA-NJ-A4YQ-01A-11R-A262-07	214.977	2510.95	2725.93	0.535985
TCGA-50-5072-01A-21R-1858-07	185.081	738.598	923.679	0.738082
TCGA-91-6831-01A-11R-1858-07	840.704	1308.51	2149.21	0.605449
TCGA-91-A4BD-01A-11R-A24H-07	-321.312	1981.84	1660.53	0.660934
TCGA-69-8255-01A-11R-2287-07	-665.674	1929.43	1263.76	0.703496
TCGA-69-8253-01A-11R-2287-07	-341.332	976.812	635.48	0.765957
TCGA-86-A4D0-01A-11R-A24H-07	-895.233	434.133	-461.099	0.859092
TCGA-78-8640-01A-11R-2403-07	-554.575	1202.14	647.566	0.764815
TCGA-97-8174-01A-11R-2287-07	927.418	1663.98	2591.4	0.552551
TCGA-55-6987-01A-11R-1949-07	828.215	2949.44	3777.66	0.399794
TCGA-49-6744-01A-11R-1858-07	1340.14	2426.59	3766.73	0.401265
TCGA-55-8096-01A-11R-2241-07	1128	1729.97	2857.98	0.519522
TCGA-J2-8192-01A-11R-2241-07	1695.15	2071.19	3766.34	0.401317
TCGA-44-7671-01A-11R-2066-07	337.734	356.044	693.778	0.760427
TCGA-44-2662-01B-02R-A277-07	1345.21	1692.39	3037.6	0.496815
TCGA-93-A4JN-01A-11R-A24X-07	425.387	1352.76	1778.15	0.64788
TCGA-49-AAR9-01A-21R-A41B-07	-723.17	60.5357	-662.634	0.873855
TCGA-86-A4P8-01A-11R-A24X-07	1190.42	2949.3	4139.71	0.35054
TCGA-44-5645-01A-01R-A278-07	363.558	1865.26	2228.82	0.596107
TCGA-78-7158-01A-11R-2039-07	-477.75	601.837	124.087	0.812014
TCGA-80-5611-01A-01R-1628-07	-65.0467	2035.74	1970.7	0.626094
TCGA-44-4112-01A-01R-1107-07	868.233	1253.77	2122	0.608623
TCGA-71-6725-01A-11R-1858-07	-628.056	626.028	-2.02857	0.822679
TCGA-44-2656-01A-02R-A278-07	1022.22	2296.56	3318.78	0.460582
TCGA-05-5715-01A-01R-1628-07	748.985	1419.27	2168.25	0.603222
TCGA-64-5815-01A-01R-1628-07	1668.69	1946.62	3615.32	0.421521
TCGA-55-7816-01A-11R-2170-07	1705.89	2175.73	3881.62	0.385761
TCGA-95-7948-01A-11R-2187-07	-256.686	693.2	436.514	0.784404
TCGA-05-4432-01A-01R-1206-07	129.002	1493.64	1622.64	0.665097
TCGA-99-8033-01A-11R-2241-07	-12.6782	1689.43	1676.75	0.659145
TCGA-78-7143-01A-11R-2039-07	-520.321	1345.83	825.513	0.747728
TCGA-73-4668-01A-01R-1206-07	276.924	733.708	1010.63	0.729411
TCGA-44-5644-01A-21R-2039-07	-954.662	-45.7946	-1000.46	0.89688
TCGA-38-4625-01A-01R-1206-07	216.63	1613.12	1829.75	0.642092
TCGA-91-8499-01A-11R-2403-07	-148.391	1179.03	1030.64	0.727398
TCGA-86-6851-01A-11R-1949-07	497.595	2745.15	3242.75	0.47046
TCGA-44-6779-01A-11R-1858-07	876.15	2352.94	3229.09	0.472227
TCGA-78-7537-01A-11R-2066-07	251.172	851.556	1102.73	0.720097
TCGA-05-4434-01A-01R-1206-07	876.824	2357.61	3234.43	0.471536
TCGA-67-3773-01A-01R-0946-07	775.029	2080.26	2855.29	0.519859
TCGA-55-6983-01A-11R-1949-07	670.799	1923.86	2594.66	0.552152
TCGA-05-5425-01A-02R-1628-07	557.424	2297.14	2854.56	0.51995
TCGA-97-A4M2-01A-12R-A24X-07	606.211	2569.32	3175.54	0.479142
TCGA-50-5941-01A-11R-1755-07	860.862	2581.14	3442	0.444453
TCGA-78-7539-01A-11R-2066-07	50.4224	2112.26	2162.68	0.603874
TCGA-67-3771-01A-01R-0946-07	540.951	1679.18	2220.13	0.597131
TCGA-55-8299-01A-11R-2287-07	1492	2556.95	4048.95	0.362986
TCGA-05-5429-01A-01R-1628-07	-60.6278	646.094	585.466	0.770656
TCGA-93-A4JO-01A-21R-A24X-07	613.245	2428.92	3042.16	0.496234
TCGA-44-A47A-01A-21R-A24H-07	86.1765	1900.52	1986.7	0.624261
TCGA-44-2662-01A-01R-0946-07	1011.63	2112.39	3124.02	0.485766
TCGA-86-A4JF-01A-11R-A24X-07	-40.3455	1701.05	1660.7	0.660915
TCGA-05-4402-01A-01R-1206-07	540.572	1434	1974.57	0.625651
TCGA-97-8179-01A-11R-2287-07	163.878	817.005	980.883	0.732391
TCGA-55-7914-01A-11R-2170-07	129.739	1361.22	1490.96	0.679406
TCGA-49-4490-01A-21R-1858-07	375.502	1057.41	1432.91	0.685634
TCGA-55-8090-01A-11R-2241-07	253.67	1328.61	1582.28	0.66951
TCGA-MP-A4TC-01A-11R-A24X-07	1144.81	1751.62	2896.44	0.514689
TCGA-64-1681-01A-11R-2066-07	452.494	1526.82	1979.31	0.625107
TCGA-99-AA5R-01A-11R-A39D-07	1137.74	2779.27	3917.01	0.380964
TCGA-49-4486-01A-01R-1206-07	-1121.66	266.006	-855.655	0.887278
TCGA-91-6847-01A-11R-1949-07	-1647.96	-433.882	-2081.84	0.955514
TCGA-05-4249-01A-01R-1107-07	361.292	1552.3	1913.59	0.632608
TCGA-91-A4BC-01A-11R-A24H-07	1133.23	2629.09	3762.31	0.401858
TCGA-55-7570-01A-11R-2039-07	-591.584	-87.3407	-678.924	0.875015
TCGA-50-5049-01A-01R-1628-07	1827.52	3067.59	4895.12	0.244751
TCGA-86-8672-01A-21R-2403-07	692.473	1936.23	2628.7	0.547979
TCGA-50-5066-02A-11R-2090-07	175.446	1030.26	1205.71	0.709526
TCGA-55-7727-01A-11R-2170-07	-92.2243	1590.82	1498.6	0.678583
TCGA-86-8674-01A-21R-2403-07	-747.988	-54.1905	-802.178	0.88363
TCGA-53-A4EZ-01A-12R-A24X-07	-808.058	461.933	-346.125	0.850332
TCGA-69-7761-01A-11R-2170-07	682.952	2391.07	3074.02	0.492168
TCGA-50-5942-01A-21R-1755-07	274.678	1084.56	1359.24	0.693466
TCGA-69-A59K-01A-11R-A262-07	-84.2436	1388.99	1304.75	0.699207
TCGA-44-2666-01A-01R-A278-07	-386.754	444.664	57.9099	0.817645
TCGA-50-5944-01A-11R-1755-07	940.474	1072.52	2013	0.62124
TCGA-50-6592-01A-11R-1755-07	562.53	1963.74	2526.27	0.560494
TCGA-62-8395-01A-11R-2326-07	556.089	805.873	1361.96	0.693178
TCGA-05-4410-01A-21R-1858-07	195.334	2032.96	2228.3	0.596169
TCGA-55-6975-01A-11R-1949-07	1071.99	903.112	1975.1	0.62559
TCGA-73-4662-01A-01R-1206-07	351.092	1908.49	2259.59	0.592475
TCGA-49-6767-01A-11R-1858-07	-91.9951	1645.94	1553.94	0.672594
TCGA-44-A47G-01A-21R-A24H-07	1048.77	2608.82	3657.59	0.415886
TCGA-NJ-A4YG-01A-22R-A262-07	429.641	1621.35	2050.99	0.61686
TCGA-55-8507-01A-11R-2403-07	-33.0393	878.28	845.24	0.745802
TCGA-05-4433-01A-22R-1858-07	8.05268	2030.42	2038.47	0.618306
TCGA-55-A4DG-01A-11R-A24H-07	-237.368	1450.36	1212.99	0.708772
TCGA-49-4494-01A-01R-1206-07	-15.9339	1479.28	1463.35	0.682375
TCGA-NJ-A7XG-01A-12R-A39D-07	-1422.86	196.896	-1225.97	0.911026
TCGA-44-6147-01A-11R-A278-07	825.33	1314.43	2139.76	0.606553
TCGA-49-AARO-01A-12R-A41B-07	875.19	2295.28	3170.47	0.479795
TCGA-44-6774-01A-21R-1858-07	2027.66	1561.73	3589.39	0.42497
TCGA-49-AAR4-01A-12R-A41B-07	245.556	2395.7	2641.25	0.546437
TCGA-91-6848-01A-11R-1949-07	1193.93	2102	3295.93	0.463557
TCGA-50-8460-01A-11R-2326-07	468.795	2019.44	2488.23	0.565109
TCGA-44-2668-01B-02R-A277-07	991.362	2464.09	3455.45	0.442683
TCGA-55-8091-01A-11R-2241-07	1214.59	1941.95	3156.54	0.481588
TCGA-50-6673-01A-11R-1949-07	531.569	1153.21	1684.78	0.658258
TCGA-49-AARE-01A-11R-A41B-07	61.8743	1155.33	1217.2	0.708336
TCGA-55-6985-01A-11R-1949-07	806.429	1970.65	2777.08	0.529632
TCGA-55-6642-01A-11R-1858-07	1500.46	1627.09	3127.55	0.485313
TCGA-50-6591-01A-11R-1755-07	-861.169	-895.445	-1756.61	0.940351
TCGA-78-7166-01A-12R-2066-07	-749.6	829.121	79.5207	0.815815
TCGA-05-4427-01A-21R-1858-07	351.249	1393.64	1744.89	0.651591
TCGA-49-4487-01A-21R-1858-07	799.465	2287.76	3087.22	0.49048
TCGA-73-4676-01A-01R-1755-07	122.605	1082.53	1205.13	0.709585
TCGA-49-4507-01A-01R-1206-07	-29.0932	1990.87	1961.78	0.627114
TCGA-78-7148-01A-11R-2039-07	-180.252	1030.77	850.518	0.745286
TCGA-55-8514-01A-11R-2403-07	-175.33	1168.51	993.183	0.73116
TCGA-93-A4JQ-01A-11R-A24X-07	1099.8	2340.68	3440.48	0.444652
TCGA-55-7576-01A-11R-2066-07	495.977	1425.01	1920.99	0.631766
TCGA-55-6969-01A-11R-1949-07	1045.72	2118.91	3164.63	0.480547
TCGA-93-7347-01A-11R-2187-07	1140.39	2619.92	3760.31	0.402128
TCGA-69-7978-01A-11R-2187-07	1157.44	2664.08	3821.51	0.393886
TCGA-NJ-A4YF-01A-12R-A262-07	-537.456	480.635	-56.8211	0.827224
TCGA-91-6830-01A-11R-1949-07	964.196	1755.76	2719.96	0.536725
TCGA-44-7672-01A-11R-2066-07	1271.07	2531.74	3802.81	0.396408
TCGA-78-7540-01A-11R-2066-07	-530.647	1006.3	475.654	0.780827
TCGA-55-7227-01A-11R-2039-07	986.862	2066.5	3053.36	0.494805
TCGA-MP-A4T6-01A-32R-A262-07	-854.028	1437.5	583.472	0.770842
TCGA-99-8028-01A-11R-2241-07	1511.61	3035.96	4547.57	0.293876
TCGA-64-1677-01A-01R-0946-07	-472.605	1489.18	1016.57	0.728814
TCGA-05-4403-01A-01R-1206-07	441.632	1819.21	2260.85	0.592326
TCGA-44-6148-01A-11R-1755-07	663.589	1320.18	1983.77	0.624597
TCGA-55-6980-01A-11R-1949-07	993.842	2090.12	3083.96	0.490897
TCGA-55-8511-01A-11R-2403-07	825.994	1934.39	2760.39	0.531708
TCGA-86-8278-01A-11R-2287-07	680.951	1373.59	2054.54	0.61645
TCGA-78-7167-01A-11R-2066-07	-468.164	128.834	-339.33	0.849807
TCGA-55-8615-01A-11R-2403-07	-486.521	327.126	-159.396	0.83559
TCGA-55-A494-01A-11R-A24X-07	-1097.2	-604.152	-1701.35	0.93756
TCGA-78-7147-01A-11R-2039-07	-669.275	1061.35	392.077	0.788433
TCGA-97-A4M0-01A-11R-A24X-07	-84.6413	2075.13	1990.49	0.623826
TCGA-55-7573-01A-11R-2039-07	432.769	1857.09	2289.86	0.588889
TCGA-86-7714-01A-12R-2170-07	236.649	1353.3	1589.95	0.668673
TCGA-64-1679-01A-21R-2066-07	1287.54	1383.83	2671.38	0.542728
TCGA-64-1680-01A-02R-0946-07	-501.272	806.697	305.425	0.796193
TCGA-86-8669-01A-11R-2403-07	-88.9313	1384.93	1296	0.700124
TCGA-78-7145-01A-11R-2039-07	314.496	988.887	1303.38	0.69935
TCGA-86-8075-01A-11R-2241-07	1343.54	1418.87	2762.41	0.531456
TCGA-99-8025-01A-11R-2241-07	278.316	755.856	1034.17	0.727043
TCGA-L9-A743-01A-43R-A39D-07	887.089	2484.68	3371.77	0.453663
TCGA-86-8054-01A-11R-2241-07	-397.517	35.1195	-362.398	0.851587
TCGA-55-8094-01A-11R-2241-07	-1623.27	-478.295	-2101.57	0.956364
TCGA-62-A470-01A-11R-A24H-07	-389.903	691.954	302.05	0.796492
TCGA-44-2666-01A-01R-0946-07	-364.816	747.042	382.226	0.789321
TCGA-86-A456-01A-11R-A24H-07	469.095	1802.32	2271.42	0.591075
TCGA-MP-A4SW-01A-21R-A24X-07	240.154	1850.86	2091.01	0.612226
TCGA-44-3919-01A-02R-1107-07	731.206	2177.9	2909.11	0.513094
TCGA-44-5645-01A-01R-1628-07	491.208	2185.26	2676.46	0.542101
TCGA-80-5608-01A-31R-1949-07	-492.528	972.703	480.175	0.780412
TCGA-75-6207-01A-11R-1755-07	-339.165	801.5	462.334	0.782047
TCGA-69-7973-01A-11R-2187-07	54.3136	523.299	577.613	0.77139
TCGA-86-8671-01A-11R-2403-07	1583.08	3214.41	4797.49	0.25862
TCGA-67-3772-01A-01R-0946-07	1102.6	1742.05	2844.65	0.521192
TCGA-35-4122-01A-01R-1107-07	1030.79	2535.35	3566.14	0.428057
TCGA-55-8513-01A-11R-2403-07	764.923	2246.63	3011.55	0.50013
TCGA-35-4123-01A-01R-1107-07	962.355	2480.17	3442.53	0.444383
TCGA-49-6761-01A-31R-1949-07	129.976	1693.05	1823.03	0.642847
TCGA-55-6982-01A-11R-1949-07	1102.26	1630.41	2732.67	0.535149
TCGA-44-A4SU-01A-11R-A24X-07	66.7902	1184.55	1251.34	0.70479
TCGA-86-8279-01A-11R-2287-07	487.227	644.773	1132	0.717109
TCGA-05-4396-01A-21R-1858-07	-392.288	371.679	-20.6092	0.824226
TCGA-86-8358-01A-11R-2326-07	-332.15	499.966	167.815	0.808251
TCGA-55-7815-01A-11R-2170-07	1126.68	1740.37	2867.06	0.518383
TCGA-78-7162-01A-21R-2066-07	548.606	1673.27	2221.87	0.596926
TCGA-NJ-A55A-01A-11R-A262-07	545.88	2021.81	2567.69	0.555448
TCGA-MN-A4N1-01A-11R-A24X-07	-418.072	320.489	-97.583	0.830572
TCGA-44-2668-01A-01R-A278-07	1118.42	2100.18	3218.6	0.473584
TCGA-44-6777-01A-11R-1858-07	2087.42	2637.96	4725.38	0.26883
TCGA-55-8301-01A-11R-2287-07	959.309	2627.42	3586.73	0.425322
TCGA-05-4422-01A-01R-1206-07	-361.862	2013.68	1651.81	0.661894
TCGA-49-4506-01A-01R-1206-07	-4.30423	1859.31	1855	0.639245
TCGA-05-4417-01A-22R-1858-07	1532.15	2134.92	3667.07	0.414621
TCGA-75-5146-01A-01R-1628-07	204.288	1628.93	1833.22	0.641701
TCGA-62-A46O-01A-11R-A24H-07	-1434.52	-719.613	-2154.13	0.95859
TCGA-97-8552-01A-11R-2403-07	294.367	1958.81	2253.18	0.593232
TCGA-75-6203-01A-11R-1755-07	1005.6	2593.55	3599.15	0.423672
TCGA-MP-A5C7-01A-11R-A262-07	-873.29	-15.5027	-888.793	0.889511
TCGA-86-8074-01A-11R-2241-07	899.744	1476.32	2376.06	0.578616
TCGA-97-7937-01A-11R-2170-07	-46.563	470.297	423.734	0.785566
TCGA-97-8175-01A-11R-2287-07	10.7994	1691.69	1702.49	0.656299
TCGA-97-A4M7-01A-11R-A24X-07	635.979	2238.4	2874.38	0.517463
TCGA-05-4420-01A-01R-1206-07	-64.9534	481.807	416.854	0.78619
TCGA-91-8497-01A-11R-2403-07	729.486	2153.26	2882.75	0.516412
TCGA-38-4632-01A-01R-1755-07	467.327	2013.57	2480.9	0.565997
TCGA-75-6211-01A-11R-1755-07	100.803	592.707	693.51	0.760453
TCGA-69-7979-01A-11R-2187-07	68.9321	396.055	464.987	0.781804
TCGA-78-7163-01A-12R-2066-07	-1549.02	309.887	-1239.13	0.911822
TCGA-86-7701-01A-11R-2170-07	796.253	2120.98	2917.24	0.51207
TCGA-67-3770-01A-01R-0946-07	259.475	1780.33	2039.81	0.618152
TCGA-38-4629-01A-02R-1206-07	1179.56	2291.71	3471.27	0.440599
TCGA-55-6972-01A-11R-1949-07	-1593.68	-346.672	-1940.35	0.949183
TCGA-MP-A4TA-01A-21R-A24X-07	-119.865	1255.69	1135.82	0.716717
TCGA-50-5931-01A-11R-1755-07	-343.281	-148.18	-491.461	0.861365
TCGA-55-7994-01A-11R-2187-07	-139.094	2216.02	2076.92	0.61386
TCGA-55-7724-01A-11R-2170-07	925.143	2032.51	2957.66	0.506965
TCGA-55-7725-01A-11R-2170-07	9.21363	2083.72	2092.93	0.612003
TCGA-MP-A4SY-01A-21R-A24X-07	746.843	1007.15	1754	0.650576
TCGA-97-7546-01A-11R-2039-07	939.737	1822.86	2762.6	0.531433
TCGA-78-7154-01A-11R-2039-07	-202.534	522.52	319.987	0.794898
TCGA-73-4659-01A-01R-1206-07	689.679	1241.55	1931.23	0.6306
TCGA-50-5068-01A-01R-1628-07	863.588	2482.15	3345.74	0.457066
TCGA-69-7980-01A-11R-2187-07	425.411	1676.75	2102.16	0.610932
TCGA-73-7498-01A-12R-2187-07	525.386	1306.05	1831.44	0.641901
TCGA-86-8585-01A-11R-2403-07	163.067	2193.28	2356.34	0.580974
TCGA-78-7542-01A-21R-2066-07	-1069.76	931.233	-138.525	0.833903
TCGA-05-4250-01A-01R-1107-07	604.63	1790.59	2395.22	0.57632
TCGA-44-6776-01A-11R-1858-07	-505.778	279.376	-226.402	0.840953
TCGA-38-4630-01A-01R-1206-07	-176.364	294.284	117.92	0.812542
TCGA-05-4418-01A-01R-1206-07	253.497	1823.37	2076.87	0.613866
TCGA-55-8085-01A-11R-2241-07	83.2862	1925.5	2008.78	0.621725
TCGA-55-7995-01A-11R-2187-07	196.14	2466.63	2662.77	0.543788
TCGA-55-7284-01B-11R-2241-07	576.12	1744.47	2320.59	0.585238
TCGA-55-6979-01A-11R-1949-07	1218.98	2781.19	4000.16	0.369649
TCGA-62-A472-01A-11R-A24H-07	-345.977	1528.47	1182.49	0.711924
TCGA-55-8204-01A-11R-2241-07	209.326	1422.82	1632.15	0.664054
TCGA-62-8398-01A-11R-2326-07	41.1638	1336.98	1378.14	0.691464
TCGA-MP-A4TI-01A-21R-A24X-07	1394.36	2950.27	4344.63	0.322215
TCGA-44-2656-01A-02R-0946-07	1010.96	2630.65	3641.61	0.418018
TCGA-67-4679-01B-01R-1755-07	702.458	1708.65	2411.11	0.574412
TCGA-05-4390-01A-02R-1755-07	369.269	729.898	1099.17	0.720459
TCGA-44-8120-01A-11R-2241-07	694.159	1176.64	1870.8	0.63746
TCGA-O1-A52J-01A-11R-A262-07	-6.87828	1791.67	1784.79	0.647136
TCGA-67-6217-01A-11R-1755-07	341.84	1848.58	2190.42	0.600623
TCGA-44-6146-01A-11R-1755-07	-648.518	323.078	-325.44	0.84873
TCGA-55-5899-01A-11R-1628-07	514.632	1231.44	1746.08	0.651459
TCGA-MP-A4TK-01A-11R-A24X-07	1455.06	2013.56	3468.62	0.440949
TCGA-MN-A4N4-01A-12R-A24X-07	792.589	1090.54	1883.12	0.636065
TCGA-73-4666-01A-01R-1206-07	233.914	2296.17	2530.08	0.56003
TCGA-L4-A4E6-01A-11R-A24H-07	1195.59	2727.07	3922.66	0.380195
TCGA-55-8207-01A-11R-2241-07	1192.5	1742.76	2935.26	0.509795
TCGA-38-A44F-01A-11R-A24H-07	770.768	2423.6	3194.37	0.476714
TCGA-78-7536-01A-11R-2066-07	-276.781	1186.32	909.541	0.739481
TCGA-05-4389-01A-01R-1206-07	-13.1145	2020.41	2007.29	0.621896
TCGA-55-7281-01A-11R-2039-07	914.24	2104.09	3018.33	0.499267
TCGA-97-7547-01A-11R-2039-07	339.634	1191.58	1531.21	0.675059
TCGA-62-8394-01A-11R-2326-07	-122.362	1037.09	914.727	0.738968
TCGA-86-8668-01A-11R-2403-07	968.404	1658.2	2626.61	0.548236
TCGA-50-5939-01A-11R-1628-07	738.741	1841.45	2580.19	0.553921
TCGA-38-7271-01A-11R-2039-07	1391.91	3020.36	4412.27	0.312799
TCGA-49-AARQ-01A-11R-A41B-07	-797.106	1289.79	492.688	0.779263
TCGA-64-1678-01A-01R-0946-07	-720.478	68.0609	-652.417	0.873125
TCGA-49-AAR3-01A-11R-A41B-07	875.116	2491.79	3366.9	0.4543
TCGA-05-4395-01A-01R-1206-07	-283.53	1358.76	1075.23	0.722891
TCGA-44-A479-01A-31R-A24H-07	1113.7	2596.53	3710.23	0.408847
TCGA-49-4514-01A-21R-1858-07	-425.225	1373.23	948.005	0.735668
TCGA-62-A46S-01A-11R-A24H-07	-130.958	1244.37	1113.41	0.719007
TCGA-55-A490-01A-11R-A466-07	469.151	1237.06	1706.21	0.655887
TCGA-97-7938-01A-11R-2170-07	254.213	969.26	1223.47	0.707686
TCGA-55-8097-01A-11R-2241-07	246.92	1264.21	1511.13	0.677231
TCGA-55-8208-01A-11R-2241-07	1432.31	2884.72	4317.03	0.326047
TCGA-69-7974-01A-11R-2187-07	716.561	2095.65	2812.21	0.525251
TCGA-55-6968-01A-11R-1949-07	132.708	1671.76	1804.46	0.644932
TCGA-44-3917-01B-02R-A277-07	108.634	1043.83	1152.47	0.715011
TCGA-05-4415-01A-22R-1858-07	-797.383	673.424	-123.958	0.832721
TCGA-44-6145-01A-11R-1755-07	965.462	2377.53	3342.99	0.457424
TCGA-75-7030-01A-11R-1949-07	1135.83	1774.27	2910.1	0.512969
TCGA-44-7667-01A-31R-2066-07	-302.032	369.799	67.7669	0.816811
TCGA-97-7553-01A-21R-2039-07	1072.72	2820.54	3893.26	0.384184
TCGA-78-7150-01A-21R-2039-07	231.007	202.2	433.206	0.784705
TCGA-69-7763-01A-11R-2170-07	908.136	1169.45	2077.59	0.613783
TCGA-95-7947-01A-11R-2187-07	-543.573	1264.25	720.676	0.757857
TCGA-55-8089-01A-11R-2241-07	776.282	2892.14	3668.42	0.41444
TCGA-86-7711-01A-11R-2066-07	822.145	1712.59	2534.73	0.559465
TCGA-55-8621-01A-11R-2403-07	1244.95	2596.87	3841.82	0.391144
TCGA-49-4501-01A-01R-1206-07	704.488	1767.27	2471.76	0.567103
TCGA-L9-A8F4-01A-11R-A39D-07	290.191	2081.12	2371.31	0.579185
TCGA-86-7953-01A-11R-2187-07	315.903	1875.71	2191.61	0.600484
TCGA-38-4628-01A-01R-1206-07	616.292	1168.58	1784.87	0.647127
TCGA-55-A48Y-01A-11R-A24H-07	786.001	1085.23	1871.23	0.637412
TCGA-MP-A4T9-01A-11R-A24X-07	627.955	1689.52	2317.48	0.585608
TCGA-91-6835-01A-11R-1858-07	1112.47	2845.62	3958.08	0.375382
TCGA-50-6590-01A-12R-1858-07	611.036	2259.05	2870.08	0.518002
TCGA-95-7039-01A-11R-1949-07	287.647	941.217	1228.86	0.707127
TCGA-55-8206-01A-11R-2241-07	609.222	2300.33	2909.55	0.513039
TCGA-44-7661-01A-11R-2066-07	1110.09	2175.35	3285.44	0.46492
TCGA-J2-A4AD-01A-11R-A24H-07	-183.401	216.534	33.1326	0.819734
TCGA-75-6206-01A-11R-1755-07	446.135	1153.03	1599.16	0.667667
TCGA-55-8616-01A-11R-2403-07	-62.5817	915.847	853.266	0.745017
TCGA-50-5051-01A-21R-1858-07	-444.629	383.563	-61.0659	0.827574
TCGA-97-A4M3-01A-11R-A24X-07	205.855	489.305	695.16	0.760295
TCGA-97-7552-01A-11R-2039-07	641.723	2776.78	3418.5	0.44754
TCGA-44-2657-01A-01R-1107-07	964.978	2803	3767.98	0.401096
TCGA-97-8172-01A-11R-2287-07	1055.84	2199.11	3254.95	0.468878
TCGA-44-2662-01A-01R-A278-07	870.499	1855.7	2726.2	0.535952
TCGA-91-6840-01A-11R-1949-07	-57.5312	1286.23	1228.69	0.707144
TCGA-55-7907-01A-11R-2170-07	504.16	1712.45	2216.61	0.597545
TCGA-49-4510-01A-01R-1206-07	-49.1608	781.386	732.226	0.75675
TCGA-MP-A4SV-01A-11R-A24X-07	256.678	1761.04	2017.71	0.620698
TCGA-55-7726-01A-11R-2170-07	1218.68	1144.98	2363.66	0.5801
TCGA-35-3615-01A-01R-0946-07	9.48284	1021.05	1030.54	0.727409
TCGA-97-A4M6-01A-11R-A24X-07	601.651	2256.26	2857.92	0.51953
TCGA-86-7955-01A-11R-2187-07	-1545.37	-435.578	-1980.95	0.951042
TCGA-44-4112-01B-06R-A277-07	1033.33	1155.43	2188.76	0.600819
TCGA-L9-A443-01A-12R-A24H-07	415.627	1143.07	1558.7	0.672077
TCGA-53-7813-01A-11R-2170-07	-711.307	948.729	237.422	0.802193
TCGA-55-A491-01A-11R-A24H-07	393.39	1692.88	2086.27	0.612776
TCGA-86-8056-01A-11R-2241-07	226.178	1418.78	1644.96	0.662647
TCGA-78-8655-01A-11R-2403-07	374.989	1836.53	2211.52	0.598144
TCGA-44-6147-01A-11R-1755-07	830.448	1644.8	2475.25	0.56668
TCGA-44-6147-01B-06R-A277-07	1315.21	1666.1	2981.31	0.503969
TCGA-L9-A444-01A-21R-A24H-07	818.122	2722.19	3540.31	0.43148
TCGA-86-8055-01A-11R-2241-07	1434.06	1509.53	2943.58	0.508744
TCGA-55-6970-01A-11R-1949-07	253.201	1742.79	1996	0.623194
TCGA-49-6745-01A-11R-1858-07	946.59	2070.56	3017.15	0.499417
TCGA-05-4405-01A-21R-1858-07	1074.89	1332.96	2407.85	0.574804
TCGA-MP-A4TH-01A-31R-A262-07	354.228	2268.4	2622.63	0.548724
TCGA-99-7458-01A-11R-2039-07	1019.2	2140.93	3160.13	0.481126
TCGA-55-8508-01A-11R-2403-07	162.732	1331.47	1494.21	0.679057
TCGA-55-1594-01A-01R-0946-07	-263.583	1048.08	784.495	0.751712
TCGA-44-7669-01A-21R-2066-07	88.6978	1358.06	1446.76	0.684153
TCGA-49-6742-01A-11R-1858-07	-658.395	351.864	-306.531	0.847259
TCGA-55-7913-01B-11R-2241-07	-1209.34	315.778	-893.564	0.889831
TCGA-86-6562-01A-11R-1755-07	990.658	1157.69	2148.35	0.605549
TCGA-95-7944-01A-11R-2187-07	291.582	2295.56	2587.14	0.553072
TCGA-05-4398-01A-01R-1206-07	659.147	1982.57	2641.72	0.54638
TCGA-78-7161-01A-11R-2039-07	-158.073	56.6783	-101.394	0.830883
TCGA-50-5933-01A-11R-1755-07	1605.86	1903.26	3509.12	0.435606
TCGA-55-7728-01A-11R-2187-07	41.5906	2745.72	2787.31	0.528357
TCGA-55-8087-01A-11R-2241-07	-60.1875	853.325	793.137	0.750875
TCGA-91-7771-01A-11R-2170-07	912.225	2192.59	3104.82	0.488228
TCGA-67-6216-01A-11R-1755-07	-21.2572	1853.48	1832.22	0.641813
TCGA-95-A4VP-01A-21R-A262-07	417.825	1692.81	2110.63	0.609946
TCGA-73-4675-01A-01R-1206-07	451.622	967.666	1419.29	0.687088
TCGA-64-1676-01A-01R-0946-07	849.573	2069.89	2919.46	0.511789
TCGA-55-6981-01A-11R-1949-07	136.592	1009.71	1146.3	0.715644
TCGA-75-5147-01A-01R-1628-07	487.762	1740.61	2228.37	0.596161
TCGA-L9-A7SV-01A-11R-A39D-07	-773.018	278.558	-494.46	0.861588
TCGA-78-7160-01A-11R-2039-07	869.414	2120.52	2989.93	0.502875
TCGA-55-1595-01A-01R-0946-07	739.625	1259.06	1998.69	0.622885
TCGA-62-8402-01A-11R-2326-07	-487.273	1906.99	1419.71	0.687043
TCGA-78-8648-01A-11R-2403-07	2089.31	2883.42	4972.72	0.23369
TCGA-44-3918-01B-02R-A277-07	1149.47	2006.28	3155.75	0.48169
TCGA-80-5607-01A-31R-1949-07	53.0932	1777.83	1830.92	0.641959
TCGA-55-A57B-01A-12R-A39D-07	532.069	1529.91	2061.98	0.61559
TCGA-38-6178-01A-11R-1755-07	572.844	1004.7	1577.55	0.670026
TCGA-78-7535-01A-11R-2066-07	97.3409	1682.57	1779.91	0.647683
TCGA-55-6986-01A-11R-1949-07	-55.642	1385.98	1330.34	0.696516
TCGA-91-6849-01A-11R-1949-07	295.049	1799.33	2094.38	0.611835
TCGA-55-7903-01A-11R-2170-07	-303.684	1487.3	1183.62	0.711807
TCGA-55-A493-01A-11R-A24H-07	368.346	2210.44	2578.79	0.554093
TCGA-86-8280-01A-11R-2287-07	929.155	2178.36	3107.52	0.487882
TCGA-91-6828-01A-11R-1858-07	757.696	2101.87	2859.57	0.519322
TCGA-55-A48X-01A-11R-A24H-07	383.853	2073.09	2456.94	0.568892
TCGA-50-5932-01A-11R-1755-07	-364.235	537.722	173.488	0.80776
TCGA-NJ-A55O-01A-11R-A262-07	38.421	1479.42	1517.84	0.676506
TCGA-44-3917-01A-01R-A278-07	510.349	1400.64	1910.99	0.632903
TCGA-05-5423-01A-01R-1628-07	459.402	2234.7	2694.1	0.539924
TCGA-05-5420-01A-01R-1628-07	895.156	2889.24	3784.39	0.398888
TCGA-62-A46Y-01A-11R-A24H-07	22.6297	2041.3	2063.93	0.615364
TCGA-05-4384-01A-01R-1755-07	278.16	1366.83	1644.99	0.662644
TCGA-97-A4M1-01A-11R-A24X-07	266.958	1709.86	1976.82	0.625393
TCGA-95-7567-01A-11R-2066-07	354.457	1331.2	1685.66	0.658161
TCGA-55-7910-01A-11R-2170-07	-273.05	587.085	314.035	0.795427
TCGA-55-8619-01A-11R-2403-07	857.128	2637.11	3494.23	0.437571
TCGA-55-8302-01A-11R-2326-07	-135.186	1405.87	1270.69	0.702772
TCGA-MN-A4N5-01A-11R-A24X-07	-347.598	1530.29	1182.7	0.711902
TCGA-95-A4VK-01A-11R-A262-07	-227.609	1390.87	1163.26	0.713903
TCGA-95-8494-01A-11R-2326-07	-213.279	1402.95	1189.67	0.711183
TCGA-75-7027-01A-11R-1949-07	550.473	560.967	1111.44	0.719209
TCGA-64-5779-01A-01R-1628-07	524.448	1337.78	1862.23	0.638429
TCGA-49-4505-01A-01R-1206-07	750.09	2130	2880.09	0.516746
TCGA-44-6775-01C-02R-A277-07	1189.35	1512.76	2702.11	0.538934
TCGA-55-1592-01A-01R-0946-07	227.862	1265.08	1492.94	0.679193
TCGA-05-4397-01A-01R-1206-07	-373.721	1024.15	650.425	0.764544
TCGA-44-2665-01A-01R-0946-07	1664.21	1795.07	3459.27	0.44218
TCGA-55-A48Z-01A-12R-A24X-07	800.031	1437.63	2237.66	0.595065
TCGA-86-8359-01A-11R-2326-07	15.4505	1725.82	1741.27	0.651994
TCGA-97-8547-01A-11R-2403-07	1138.3	1385.43	2523.73	0.560803
TCGA-75-6212-01A-11R-1755-07	394.738	2020.35	2415.08	0.573935
TCGA-75-7031-01A-11R-1949-07	-286.144	1505.75	1219.61	0.708087
TCGA-44-3396-01A-01R-1206-07	1372.87	2350.38	3723.25	0.407102
TCGA-86-8281-01A-11R-2287-07	-39.1009	779.936	740.836	0.755923
TCGA-44-6775-01A-11R-A278-07	1530.76	1758.69	3289.46	0.464398
TCGA-62-8397-01A-11R-2326-07	75.9609	1419.23	1495.19	0.678951
TCGA-J2-A4AG-01A-11R-A24H-07	650.742	1983.11	2633.86	0.547346
TCGA-44-6775-01A-11R-1858-07	1587.6	1942.03	3529.63	0.432894
TCGA-78-7152-01A-11R-2039-07	105.08	1577.62	1682.7	0.658489
TCGA-93-7348-01A-21R-2039-07	730.313	1349.48	2079.8	0.613527
TCGA-64-5775-01A-01R-1628-07	121.39	936.244	1057.63	0.724674
TCGA-78-7153-01A-11R-2039-07	-440.606	633.54	192.935	0.806074
TCGA-78-7149-01A-11R-2039-07	67.7495	469.831	537.581	0.775116
TCGA-MP-A4T8-01A-11R-A24X-07	175.256	327.344	502.6	0.77835
TCGA-44-2661-01A-01R-1107-07	1261.11	2872.27	4133.38	0.35141
TCGA-44-2656-01B-06R-A277-07	1048.63	2065.5	3114.13	0.487034
TCGA-73-4658-01A-01R-1755-07	1545.89	2323.51	3869.4	0.387415
TCGA-44-6778-01A-11R-1858-07	923.363	2912.17	3835.53	0.391994
TCGA-44-7670-01A-11R-2066-07	-820.22	338.123	-482.096	0.860665
TCGA-55-8205-01A-11R-2241-07	901.562	2664.7	3566.27	0.42804
TCGA-55-8512-01A-11R-2403-07	-274.337	894.743	620.406	0.767377
TCGA-55-8203-01A-11R-2241-07	254.676	1613.93	1868.6	0.637709
TCGA-78-8660-01A-11R-2403-07	193.248	2209.66	2402.91	0.575397
TCGA-44-A47B-01A-11R-A24H-07	-6.57451	1378.39	1371.81	0.692135
TCGA-50-5946-01A-11R-1755-07	-844.072	-33.1642	-877.236	0.888735
TCGA-38-4631-01A-01R-1755-07	-384.302	963.412	579.11	0.77125
TCGA-64-5778-01A-01R-1628-07	-122.358	2348.11	2225.75	0.596469
TCGA-86-7954-01A-11R-2187-07	631.215	2243.02	2874.23	0.517482
TCGA-50-5066-01A-01R-1628-07	1195.51	2504.26	3699.78	0.410247
TCGA-55-6543-01A-11R-1755-07	341.2	1516.58	1857.78	0.638931
TCGA-73-7499-01A-11R-2187-07	334.384	2172.02	2506.4	0.562906
TCGA-44-3918-01A-01R-1107-07	1352.74	2651.08	4003.82	0.36915
TCGA-62-8399-01A-21R-2326-07	228.08	781.705	1009.79	0.729496
TCGA-49-AAR0-01A-21R-A39D-07	176.336	1839.29	2015.62	0.620938
TCGA-55-7283-01A-11R-2039-07	34.5246	1415.01	1449.53	0.683856
TCGA-75-6205-01A-11R-1755-07	1478.86	2897.79	4376.65	0.317762
TCGA-50-6593-01A-11R-1755-07	1037.51	1608.21	2645.72	0.545888
TCGA-50-8459-01A-11R-2326-07	1887.11	2406.69	4293.8	0.329269
TCGA-44-3918-01A-01R-A278-07	1474.8	2199.69	3674.49	0.41363
TCGA-67-3774-01A-01R-0946-07	354.024	1762.66	2116.68	0.609243
TCGA-49-AAQV-01A-11R-A39D-07	-337.146	1508.55	1171.41	0.713065
TCGA-38-4626-01A-01R-1206-07	1274.71	2313.41	3588.12	0.425139
TCGA-95-7562-01A-11R-2241-07	209.828	1287.85	1497.68	0.678683
TCGA-69-7760-01A-11R-2170-07	-412.413	98.6503	-313.762	0.847823
TCGA-71-8520-01A-11R-2403-07	660.031	900.506	1560.54	0.671877
TCGA-55-8614-01A-11R-2403-07	285.542	899.601	1185.14	0.71165
TCGA-55-7574-01A-11R-2039-07	1237.89	2470.89	3708.78	0.409042
TCGA-50-5935-01A-11R-1755-07	328.499	1552.04	1880.54	0.636358
TCGA-95-7043-01A-11R-1949-07	-357.68	-59.7704	-417.451	0.855795
TCGA-97-7941-01A-11R-2187-07	325.694	1349.43	1675.13	0.659325
TCGA-44-7660-01A-11R-2066-07	-508.875	840.102	331.227	0.793895
TCGA-MP-A4T7-01A-11R-A24X-07	-358.214	1362.56	1004.35	0.730041
TCGA-55-6971-01A-11R-1949-07	838.305	2693.26	3531.57	0.432638
TCGA-78-7155-01A-11R-2039-07	-1008.91	-102.678	-1111.58	0.903975
TCGA-MP-A4TE-01A-22R-A466-07	-953.904	-175.774	-1129.68	0.905108
TCGA-95-A4VN-01A-11R-A262-07	451.048	2274.5	2725.55	0.536032
TCGA-93-8067-01A-11R-2287-07	-365.613	685.754	320.14	0.794884
TCGA-J2-8194-01A-11R-2241-07	441.617	1229.78	1671.4	0.659736
TCGA-55-8510-01A-11R-2403-07	884.091	2337.44	3221.53	0.473206
TCGA-44-5643-01A-01R-1628-07	-880.255	1121.08	240.83	0.801894
TCGA-86-7713-01A-11R-2066-07	-817.113	-1.4582	-818.571	0.884754
TCGA-NJ-A55R-01A-11R-A262-07	-184.581	389.772	205.191	0.805008
TCGA-50-5044-01A-21R-1858-07	427.488	1614.33	2041.82	0.617919
TCGA-64-5774-01A-01R-1628-07	-419.416	132.54	-286.876	0.845723
TCGA-55-6712-01A-11R-1858-07	606.969	2242.64	2849.61	0.520571
TCGA-44-2659-01A-01R-0946-07	908.483	1874.34	2782.83	0.528916
TCGA-4B-A93V-01A-11R-A39D-07	-662.268	1029.69	367.425	0.790653
TCGA-86-8076-01A-31R-2241-07	438.773	2417.46	2856.23	0.519741
TCGA-83-5908-01A-21R-2287-07	500.019	2394.28	2894.3	0.514959
TCGA-44-A4SS-01A-11R-A24X-07	729.197	2179.06	2908.26	0.513201
TCGA-L4-A4E5-01A-11R-A24X-07	-417.82	583.027	165.207	0.808476
TCGA-97-8171-01A-11R-2287-07	-950.695	90.7905	-859.905	0.887565
TCGA-93-A4JP-01A-11R-A24X-07	643.925	1690.47	2334.4	0.583593
TCGA-S2-AA1A-01A-12R-A39D-07	962.124	2470.13	3432.26	0.445733
TCGA-55-6978-01A-11R-1949-07	1614.81	2583.24	4198.05	0.342507
TCGA-78-7146-01A-11R-2039-07	-430.932	810.585	379.653	0.789553
TCGA-MP-A4TD-01A-32R-A262-07	960.795	1424.44	2385.23	0.577518
TCGA-50-5930-01A-11R-1755-07	742.962	1755.42	2498.38	0.56388
TCGA-64-5781-01A-01R-1628-07	423.681	1836.38	2260.06	0.592419
TCGA-78-7159-01A-11R-2039-07	210.989	812.687	1023.68	0.7281
TCGA-69-8254-01A-11R-2287-07	-192.446	1683.29	1490.85	0.679419
TCGA-75-5126-01A-01R-1755-07	909.033	2521.34	3430.37	0.445982
TCGA-50-7109-01A-11R-2039-07	346.264	1378.63	1724.89	0.653815
TCGA-05-5428-01A-01R-1628-07	480.778	1334.89	1815.67	0.643675
TCGA-49-4512-01A-21R-1858-07	1000.81	1471.07	2471.87	0.567088
TCGA-44-6146-01B-04R-A277-07	317.932	319.254	637.186	0.765796
TCGA-NJ-A4YP-01A-11R-A262-07	972.818	1275.16	2247.98	0.593847
TCGA-49-AAR2-01A-11R-A39D-07	-488.363	1442.6	954.24	0.735048
TCGA-50-5045-01A-01R-1628-07	1628.2	2689.8	4318	0.325912
TCGA-44-8119-01A-11R-2241-07	1110.46	1364.43	2474.88	0.566725
TCGA-44-8117-01A-11R-2241-07	410.22	882.167	1292.39	0.700503
TCGA-05-4425-01A-01R-1755-07	734.161	2076.13	2810.3	0.525489
TCGA-55-1596-01A-01R-0946-07	-401.838	791.047	389.208	0.788692
TCGA-91-6836-01A-21R-1858-07	-692.871	615.404	-77.4672	0.828923
TCGA-49-4488-01A-01R-1755-07	-97.5702	1582.78	1485.21	0.680026
TCGA-99-8032-01A-11R-2241-07	722.294	1012.84	1735.14	0.652676
TCGA-49-6743-01A-11R-1858-07	644.192	1297.83	1942.02	0.62937
TCGA-44-7662-01A-11R-2066-07	1373.37	1652.1	3025.47	0.49836
TCGA-44-2655-01A-01R-0946-07	28.8558	1482.7	1511.55	0.677185
TCGA-50-5946-02A-11R-2090-07	1160.75	993.694	2154.44	0.604838
TCGA-86-8673-01A-11R-2403-07	201.128	1169.81	1370.94	0.692228
TCGA-MP-A4TF-01A-11R-A262-07	-956.318	812.497	-143.821	0.834332
TCGA-67-6215-01A-11R-1755-07	-515.408	1194.18	678.771	0.761856
TCGA-55-7911-01A-11R-2170-07	73.0305	2180.37	2253.4	0.593207
TCGA-75-6214-01A-41R-1949-07	-814.798	403.517	-411.281	0.855326
TCGA-05-4244-01A-01R-1107-07	-141.959	1481.9	1339.94	0.695504
TCGA-73-4677-01A-01R-1206-07	-68.2243	1213.09	1144.86	0.715791
TCGA-44-2666-01B-02R-A277-07	-70.9323	165.968	95.0359	0.814495
TCGA-97-7554-01A-11R-2039-07	1252.48	1446.04	2698.52	0.539378
TCGA-05-4426-01A-01R-1206-07	-174.81	1291.99	1117.18	0.718623
TCGA-97-8176-01A-11R-2403-07	-107.499	1131.18	1023.68	0.7281
TCGA-05-4382-01A-01R-1206-07	1411.45	2084.32	3495.76	0.43737
TCGA-J2-A4AE-01A-21R-A24H-07	-264.355	1669.32	1404.97	0.688614
TCGA-73-4670-01A-01R-1206-07	281.903	763.035	1044.94	0.725957
TCGA-44-2668-01A-01R-0946-07	1223.75	2300.75	3524.51	0.433572
TCGA-55-8506-01A-11R-2403-07	216.383	1334.48	1550.87	0.672928
TCGA-50-6597-01A-11R-1858-07	-88.3455	1708.76	1620.41	0.665341
TCGA-44-3398-01A-01R-1107-07	1454.09	2264.49	3718.58	0.407728
TCGA-50-6594-01A-11R-1755-07	12.1751	957.164	969.339	0.733544
TCGA-73-A9RS-01A-11R-A41B-07	-804.464	506.833	-297.632	0.846565
TCGA-53-7626-01A-12R-2066-07	943.783	2508.52	3452.3	0.443097
TCGA-55-8505-01A-11R-2403-07	411.841	339.995	751.836	0.754865
TCGA-97-A4M5-01A-11R-A24X-07	771.596	1776.09	2547.68	0.557888
TCGA-75-5125-01A-01R-1755-07	534.383	2054	2588.38	0.55292
TCGA-62-A46U-01A-11R-A24H-07	231.002	2927.16	3158.16	0.48138
TCGA-44-2665-01B-06R-A277-07	1431.34	1593.31	3024.64	0.498465
TCGA-MP-A4TJ-01A-51R-A262-07	1115.12	2951.95	4067.07	0.360506
TCGA-62-A46V-01A-11R-A24H-07	391.674	807.525	1199.2	0.710199
TCGA-50-5055-01A-01R-1628-07	1490.14	2938.17	4428.31	0.310563
TCGA-69-8453-01A-12R-2326-07	737.283	2593.31	3330.59	0.459043
TCGA-91-6829-01A-21R-1858-07	1294.29	866.505	2160.79	0.604095
